# Supplementary material for: Synthesis and characterization of a novel POM compound containing two different layers stacked alternately
Source: Royal Society of Chemistry journal article supplement (doi:10.1039/b906066a), 2009-01-01
Supplement: b906066a.pdf [file b906066a.pdf]

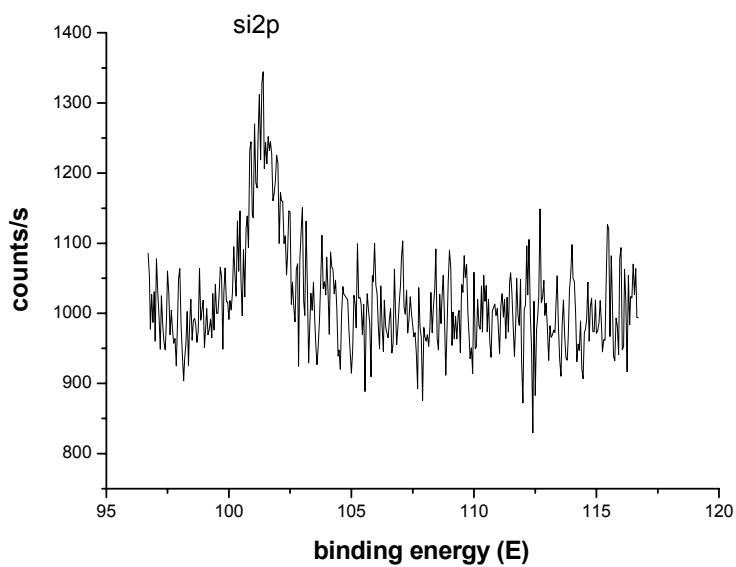

Fig S1. The XPS spectrum of the Si2p region of compound **1**.

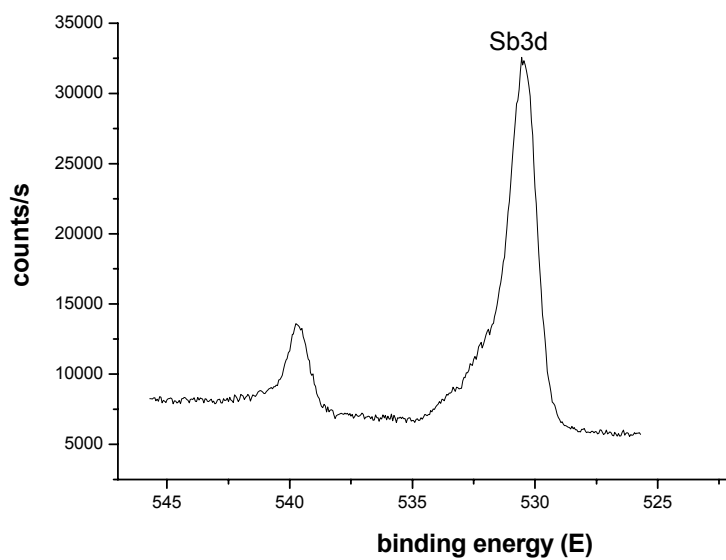

Fig S2. The XPS spectrum of the Sb3d region of compound **1**.

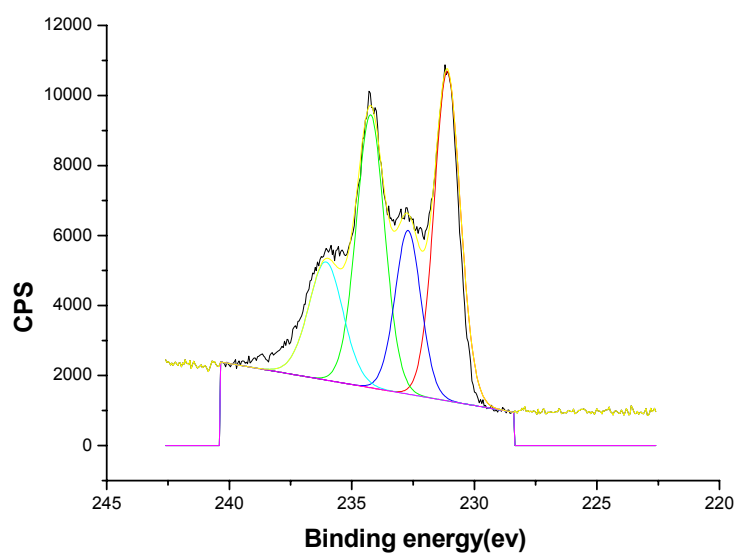

Fig S3. The XPS spectrum of the Mo3d region of compound 1.

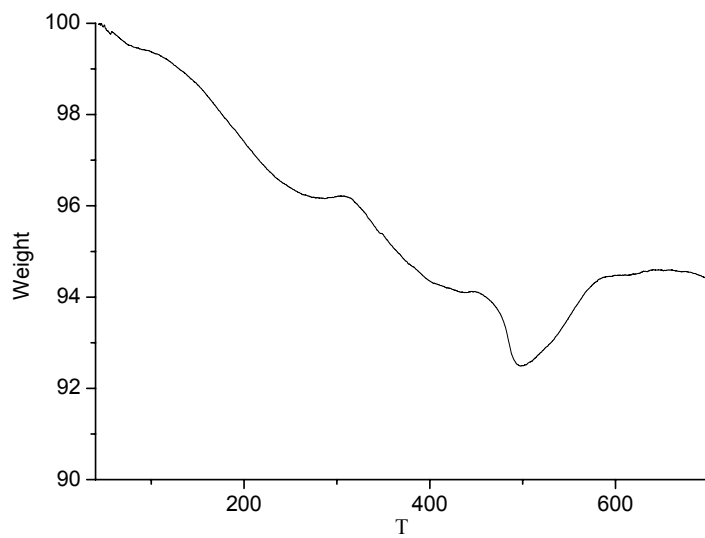

Fig s4, The TG curve of compound 1.
